# Supplementary material
Source: PubMed Central journal article supplement (PMC2922275)
Supplement: 1002828107_pnas.201002828SI.pdf [file 1002828107_pnas.201002828SI.pdf]

# Supporting Information

Zhu et al. 10.1073/pnas.1002828107

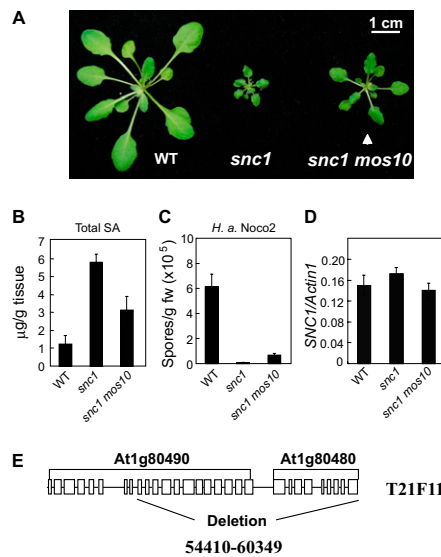

**Fig. S1.** Partial suppression of *suppressor of npr1-1*, *constitutive 1 (snc1)* mutant phenotypes by *modifier of snc1*, *10 (mos10)/topless-related 1 (tpr1)*. (A) Morphology of 4-wk-old Columbia (Col-0) wild-type, *snc1*, and *snc1-mos10* plants. (B) Total salicylic acid (SA) levels in wild-type, *snc1*, and *snc1-mos10* plants. Soil-grown 4-wk-old plants were collected for SA extraction. SA levels were measured with HPLC as previously described (1). Values are averages of four replicates  $\pm$  SD. (C) Growth of *Hyaloperonospora arabidopsidis (H. a.) Noco2* on wild-type, *snc1*, and *snc1-mos10*. Two-wk-old seedlings were sprayed with *H. a. Noco2* at a concentration of 50,000 spores/mL water. Infection was scored 7 d after inoculation by counting the number of spores per gram of leaf fresh weight (fw). Error bars represent SD from three measurements. (D) Real-time RT-PCR analysis of *SNC1* expression in wild-type, *snc1*, and *snc1-mos10* plants. (E) Sequences between nucleotides 54410 and 60349 on BAC clone T21F11 (AC018849.2) were deleted in *mos10*.

1. Li X, Zhang Y, Clarke JD, Li Y, Dong X (1999) Identification and cloning of a negative regulator of systemic acquired resistance, SN1, through a screen for suppressors of *npr1-1*. *Cell* 98: 329–339.



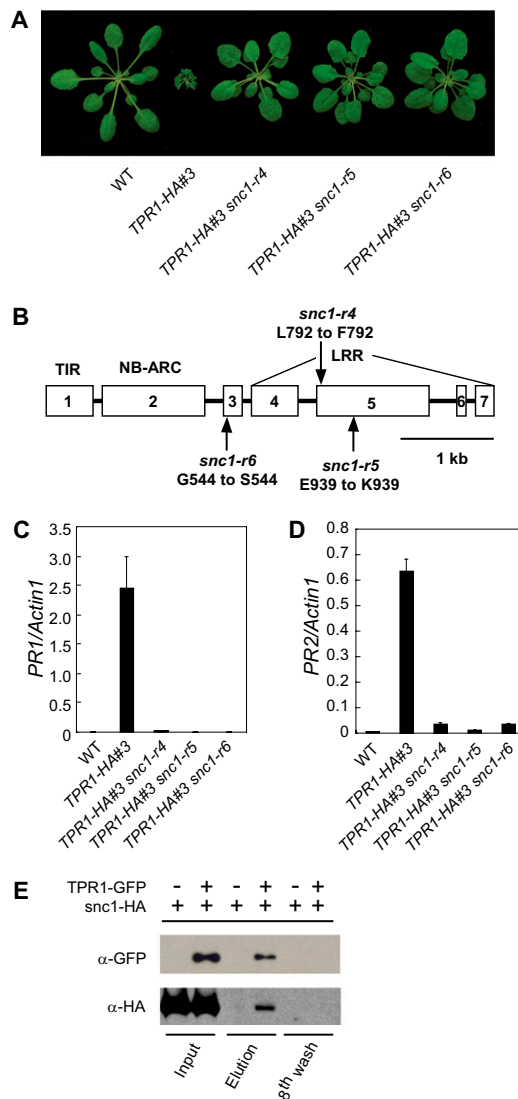

**Fig. S4.** Analysis of suppressor mutants of the *TPR1-HA* overexpression line #3 and association of *SNC1* and *TPR1* in nucleus. (A) Suppression of the stunted morphology of *TPR1-HA* overexpression line #3 by three suppressor mutants, *snc1-r4*, *snc1-r5*, and *snc1-r6*. (B) Mutations in *SNC1* identified from the three suppressor mutants. (C and D) Suppression of constitutive *PR1* (C) and *PR2* (D) expression in the *TPR1-HA* #3 overexpression line by the three suppressor mutants. (E) Association of *SNC1* and *TPR1* in nucleus. Coimmunoprecipitation of *snc1-HA* with *TPR1-GFP* in protein extracts of *TPR1-GFP* and *snc1-HA* double-tagged transgenic plants. Nuclear protein extracts were subjected to immunoprecipitation with anti-GFP magnetic beads. Crude lysates (input) and immunoprecipitated proteins (elution) were detected with anti-GFP or anti-HA antibodies.

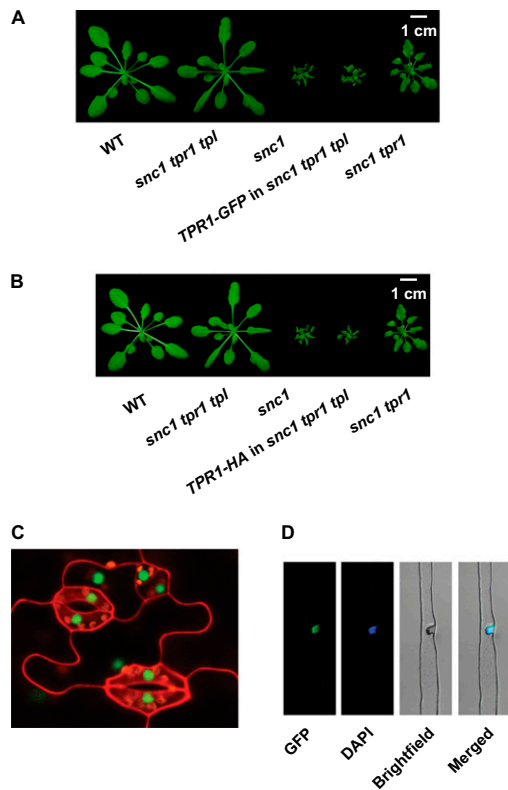

**Fig. S5.** Complementation of *snc1-tp1-tp1* mutant morphology by *TPR1-GFP* and *TPR1-HA* and localization of TPR1-GFP. (A) Complementation of *snc1-tp1-tp1* mutant morphology by *TPR1-GFP*. A construct expressing the TPR1-GFP fusion protein under the control of its native promoter was transformed into the *snc1-tp1-tp1* mutant. The picture was taken from 4-wk-old soil-grown plants. (B) Complementation of *snc1-tp1-tp1* mutant morphology by *TPR1-HA*. A construct expressing the TPR1-HA fusion protein under the control of its native promoter was transformed into the *snc1-tp1-tp1* mutant. The picture was taken from 4-wk-old soil-grown plants. (C) Localization of TPR1-GFP protein in leaf pavement and guard cells of *TPR1-GFP* transgenic plants. Plant cell walls were stained with 5 mg/mL propidium iodine (red). (D) Localization of TPR1-GFP protein in root hair cells of *TPR1-GFP* transgenic plants. The nuclei were stained with DAPI.

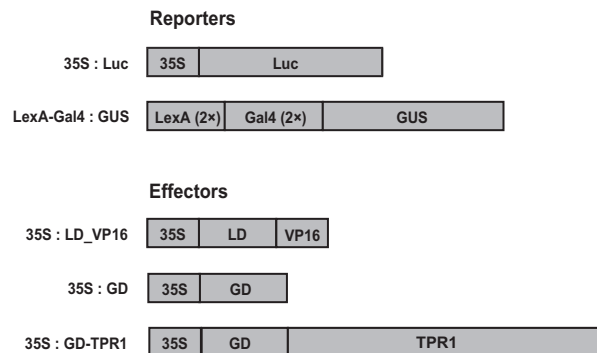

**Fig. S6.** Reporter and effector constructs used in the transfection assays. Luc, luciferase; GUS, GUS:  $\beta$ -glucuronidase.

| Target    | Fold enrichment | Annotation                          |
|-----------|-----------------|-------------------------------------|
| At5g15410 | 8.5 ± 1.7       | DND1 (Defense No Death 1)           |
| At3g20820 | 11.5 ± 2.2      | Leucine-rich repeat family protein  |
| At1g51940 | 18.6 ± 2.2      | Protein kinase family protein       |
| At4g21960 | 3.1 ± 1.1       | Peroxidase 42                       |
| At1g14720 | 7.2 ± 1.2       | XRT2                                |
| At5g54250 | 5.4 ± 3.3       | DND2 (Defense, No Death 2)          |
| At5g56040 | 3.8 ± 1.6       | Leucine-rich repeat protein kinase  |
| At4g36540 | 7.6 ± 1.4       | BR Enhanced Expression 2            |
| At3g25500 | 3.9 ± 1.5       | Formin Homolog 1                    |
| At5g07240 | 4.9 ± 1.4       | IQ-domain 24; calmodulin binding    |
| At5g61420 | 8.6 ± 3.1       | AtMYB28                             |
| At3g19000 | 6.0 ± 1.7       | 2OG-Fe(II) oxygenase family protein |

**Fig. S7.** List of target genes of TPR1 identified by ChIP followed by real-time PCR analysis. Transgenic plants expressing *TPR1-HA* were subjected to ChIP analysis using an anti-HA antibody. *TPR1-GFP* transgenic plants were used as negative controls. The fold of enrichment of a target promoter was calculated by dividing the amount of DNA immunoprecipitated from the *TPR1-HA* transgenic plants by that from the negative control plants.

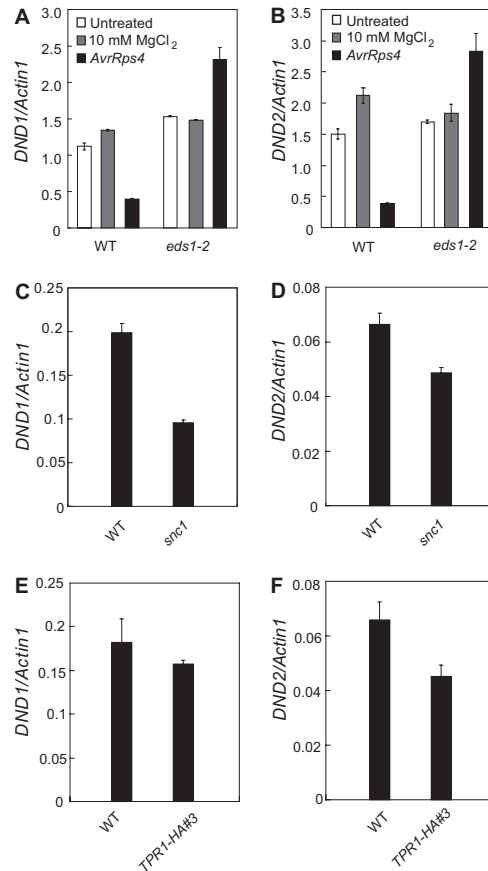

**Fig. S8.** Real-time RT-PCR analysis of *Defense no Death 1 (DND1)* and *Defense no Death 2 (DND2)* expression. (A and B) Expression of *DND1* (A) and *DND2* (B) in wild-type and *eds1-2* plants in response to *Pseudomonas syringae* pv. *tomato (P.s.t.) DC3000 AvrRps4*. Plants were infiltrated with or without *P.s.t.* DC3000 *AvrRps4* (OD<sub>600</sub> = 0.001) in 10 mM MgCl<sub>2</sub>. Samples were taken 12 h after inoculation. (C and D) Expression of *DND1* (C) and *DND2* (D) in wild-type and *snc1* plants. (E and F) Expression of *DND1* (E) and *DND2* (F) in wild-type and *TPR1-HA* overexpression line #3.
